# Supplementary material
Source: publisher figshare collection journal article supplement (https://acs.figshare.com/ndownloader/files/4504804)
Supplement: Supplementary file 1 [file 4504804]

### Supplemental Table 1.

### Observed Rotational Transitions of VCl+ (*X* 4)a

|  |  |  |  |  |  |  |  |  | V35Cl+ | |  | V37Cl+ | |
| --- | --- | --- | --- | --- | --- | --- | --- | --- | --- | --- | --- | --- | --- |
| *N* |  | *N* | *J* |  | *J* | *F* |  | *F* | obs | obs - calc |  | obs | obs - calc |
| 25 |  | 24 | 25.5 |  | 24.5 | 22 |  | 21 | 276653.093 | -0.332 |  |  |  |
|  |  |  |  |  |  | 23 |  | 22 | 276650.779 | -0.221 |  |  |  |
|  |  |  |  |  |  | 24 |  | 23 | 276648.639 | -0.104 |  |  |  |
|  |  |  |  |  |  | 25 |  | 24 | 276646.445 | -0.136 |  |  |  |
|  |  |  |  |  |  | 26 |  | 25 | 276644.371 | -0.060 |  |  |  |
|  |  |  |  |  |  | 27 |  | 26 | 276642.107 | -0.099 |  |  |  |
|  |  |  |  |  |  | 28 |  | 27 | 276639.820 | 0.009 |  |  |  |
|  |  |  |  |  |  | 29 |  | 28 | 276637.673 | 0.531 |  |  |  |
| 25 |  | 24 | 26.5 |  | 25.5 | 23 |  | 22 | 278690.310 | 0.348 |  |  |  |
|  |  |  |  |  |  | 24 |  | 23 | 278692.684 | 0.078 |  |  |  |
|  |  |  |  |  |  | 25 |  | 24 | 278694.689 | -0.216 |  |  |  |
|  |  |  |  |  |  | 26 |  | 25 | 278696.485 | -0.288 |  |  |  |
|  |  |  |  |  |  | 27 |  | 26 | 278698.130 | 0.012 |  |  |  |
|  |  |  |  |  |  | 28 |  | 27 | 278698.869 | 0.029 |  |  |  |
|  |  |  |  |  |  | 29 |  | 28 | 278698.869 | 0.037 |  |  |  |
|  |  |  |  |  |  | 30 |  | 29 | 278698.130 | 0.149 |  |  |  |
| 26 |  | 25 | 24.5 |  | 23.5 | 21 |  | 20 | 274344.855 | -0.063 |  |  |  |
|  |  |  |  |  |  | 22 |  | 21 | 274343.957 | -0.126 |  |  |  |
|  |  |  |  |  |  | 23 |  | 22 | 274343.957 | -0.076 |  |  |  |
|  |  |  |  |  |  | 24 |  | 23 | 274344.855 | 0.154 |  |  |  |
|  |  |  |  |  |  | 25 |  | 24 | 274346.272 | 0.262 |  |  |  |
|  |  |  |  |  |  | 26 |  | 25 | 274348.069 | 0.190 |  |  |  |
|  |  |  |  |  |  | 27 |  | 26 | 274350.083 | -0.135 |  |  |  |
|  |  |  |  |  |  | 28 |  | 27 | 274352.635 | -0.295 |  |  |  |
| 26 |  | 25 | 25.5 |  | 24.5 | 22 |  | 21 | 276633.409 | -0.044 |  |  |  |
|  |  |  |  |  |  | 23 |  | 22 | 276631.043 | 0.147 |  |  |  |
|  |  |  |  |  |  | 24 |  | 23 | 276628.564 | 0.064 |  |  |  |
|  |  |  |  |  |  | 25 |  | 24 | 276626.070 | -0.120 |  |  |  |
|  |  |  |  |  |  | 26 |  | 25 | 276623.544 | -0.342 |  |  |  |
|  |  |  |  |  |  | 27 |  | 26 | 276621.320 | -0.178 |  |  |  |
|  |  |  |  |  |  | 28 |  | 27 | 276618.708 | -0.221 |  |  |  |
|  |  |  |  |  |  | 29 |  | 28 | 276616.597 | 0.519 |  |  |  |
| 26 |  | 25 | 26.5 |  | 25.5 | 23 |  | 22 | 287484.273 | -0.271 |  |  |  |
|  |  |  |  |  |  | 24 |  | 23 | 287482.248 | 0.094 |  |  |  |
|  |  |  |  |  |  | 25 |  | 24 | 287479.819 | -0.105 |  |  |  |
|  |  |  |  |  |  | 26 |  | 25 | 287477.563 | -0.220 |  |  |  |
|  |  |  |  |  |  | 27 |  | 26 | 287475.433 | -0.224 |  |  |  |
|  |  |  |  |  |  | 28 |  | 27 | 287473.563 | 0.099 |  |  |  |
|  |  |  |  |  |  | 29 |  | 28 | 287471.160 | 0.044 |  |  |  |
|  |  |  |  |  |  | 30 |  | 29 | 287469.077 | 0.559 |  |  |  |
| 26 |  | 25 | 27.5 |  | 26.5 | 24 |  | 23 | 289509.959 | 0.282 |  |  |  |
|  |  |  |  |  |  | 25 |  | 24 | 289512.331 | 0.123 |  |  |  |
|  |  |  |  |  |  | 26 |  | 25 | 289514.229 | -0.196 |  |  |  |
|  |  |  |  |  |  | 27 |  | 26 | 289515.983 | -0.267 |  |  |  |
|  |  |  |  |  |  | 28 |  | 27 | 289517.413 | -0.186 |  |  |  |
|  |  |  |  |  |  | 29 |  | 28 | 289518.484 | 0.103 |  |  |  |
|  |  |  |  |  |  | 30 |  | 29 | 289518.484 | -0.016 |  |  |  |
|  |  |  |  |  |  | 31 |  | 30 | 289517.413 | -0.440 |  |  |  |
| 27 |  | 26 | 25.5 |  | 24.5 | 22 |  | 21 | 285178.830 | 0.302 |  |  |  |
|  |  |  |  |  |  | 23 |  | 22 | 285177.783 | -0.107 |  |  |  |
|  |  |  |  |  |  | 24 |  | 23 | 285177.783 | -0.193 |  |  |  |
|  |  |  |  |  |  | 25 |  | 24 | 285178.830 | 0.111 |  |  |  |
|  |  |  |  |  |  | 26 |  | 25 | 285180.358 | 0.308 |  |  |  |
|  |  |  |  |  |  | 27 |  | 26 | 285182.169 | 0.280 |  |  |  |
|  |  |  |  |  |  | 28 |  | 27 | 285184.378 | 0.226 |  |  |  |
|  |  |  |  |  |  | 29 |  | 28 | 285186.648 | -0.099 |  |  |  |
| 27 |  | 26 | 26.5 |  | 25.5 | 23 |  | 22 | 287462.756 | -0.060 |  |  |  |
|  |  |  |  |  |  | 24 |  | 23 | 287460.429 | 0.144 |  |  |  |
|  |  |  |  |  |  | 25 |  | 24 | 287457.995 | 0.089 |  |  |  |
|  |  |  |  |  |  | 26 |  | 25 | 287455.615 | 0.006 |  |  |  |
|  |  |  |  |  |  | 27 |  | 26 | 287453.067 | -0.250 |  |  |  |
|  |  |  |  |  |  | 28 |  | 27 | 287450.857 | -0.092 |  |  |  |
|  |  |  |  |  |  | 29 |  | 28 | 287448.160 | -0.256 |  |  |  |
|  |  |  |  |  |  | 30 |  | 29 | 287445.919 | 0.297 |  |  |  |
| 27 |  | 26 | 27.5 |  | 26.5 | 24 |  | 23 | 298313.426 | -0.231 |  |  |  |
|  |  |  |  |  |  | 25 |  | 24 | 298311.410 | 0.116 |  |  |  |
|  |  |  |  |  |  | 26 |  | 25 | 298309.143 | 0.060 |  |  |  |
|  |  |  |  |  |  | 27 |  | 26 | 298307.062 | 0.104 |  |  |  |
|  |  |  |  |  |  | 28 |  | 27 | 298304.788 | -0.062 |  |  |  |
|  |  |  |  |  |  | 29 |  | 28 | 298302.738 | 0.057 |  |  |  |
|  |  |  |  |  |  | 30 |  | 29 | 298300.322 | -0.049 |  |  |  |
|  |  |  |  |  |  | 31 |  | 30 | 298298.163 | 0.331 |  |  |  |
| 27 |  | 26 | 28.5 |  | 27.5 | 25 |  | 24 | 300327.339 | 0.177 |  |  |  |
|  |  |  |  |  |  | 26 |  | 25 | 300329.533 | -0.053 |  |  |  |
|  |  |  |  |  |  | 27 |  | 26 | 300331.530 | -0.196 |  |  |  |
|  |  |  |  |  |  | 28 |  | 27 | 300333.141 | -0.369 |  |  |  |
|  |  |  |  |  |  | 29 |  | 28 | 300334.983 | 0.121 |  |  |  |
|  |  |  |  |  |  | 30 |  | 29 | 300335.899 | 0.200 |  |  |  |
|  |  |  |  |  |  | 31 |  | 30 | 300335.899 | -0.035 |  |  |  |
|  |  |  |  |  |  | 32 |  | 31 | 300335.899 | 0.427 |  |  |  |
| 28 |  | 27 | 26.5 |  | 25.5 | 23 |  | 22 | 296009.982 | -0.438 |  |  |  |
|  |  |  |  |  |  | 24 |  | 23 | 296009.982 | 0.021 |  |  |  |
|  |  |  |  |  |  | 25 |  | 24 | 296009.982 | -0.186 |  |  |  |
|  |  |  |  |  |  | 26 |  | 25 | 296011.233 | 0.253 |  |  |  |
|  |  |  |  |  |  | 27 |  | 26 | 296012.567 | 0.240 |  |  |  |
|  |  |  |  |  |  | 28 |  | 27 | 296014.218 | 0.083 |  |  |  |
|  |  |  |  |  |  | 29 |  | 28 | 296016.221 | -0.105 |  |  |  |
|  |  |  |  |  |  | 30 |  | 29 | 296018.542 | -0.269 |  |  |  |
| 28 |  | 27 | 27.5 |  | 26.5 | 24 |  | 23 | 298290.193 | 0.113 |  |  |  |
|  |  |  |  |  |  | 25 |  | 24 | 298287.774 | 0.206 |  |  |  |
|  |  |  |  |  |  | 26 |  | 25 | 298285.319 | 0.121 |  |  |  |
|  |  |  |  |  |  | 27 |  | 26 | 298282.977 | 0.071 |  |  |  |
|  |  |  |  |  |  | 28 |  | 27 | 298280.461 | -0.160 |  |  |  |
|  |  |  |  |  |  | 29 |  | 28 | 298277.906 | -0.359 |  |  |  |
|  |  |  |  |  |  | 30 |  | 29 | 298275.858 | 0.101 |  |  |  |
|  |  |  |  |  |  | 31 |  | 30 | 298273.101 | 0.093 |  |  |  |
| 28 |  | 27 | 28.5 |  | 27.5 | 25 |  | 24 | 309140.651 | -0.031 |  |  |  |
|  |  |  |  |  |  | 26 |  | 25 | 309138.477 | 0.137 |  |  |  |
|  |  |  |  |  |  | 27 |  | 26 | 309136.243 | 0.100 |  |  |  |
|  |  |  |  |  |  | 28 |  | 27 | 309134.084 | 0.056 |  |  |  |
|  |  |  |  |  |  | 29 |  | 28 | 309131.935 | 0.004 |  |  |  |
|  |  |  |  |  |  | 30 |  | 29 | 309129.718 | -0.062 |  |  |  |
|  |  |  |  |  |  | 31 |  | 30 | 309127.840 | 0.340 |  |  |  |
|  |  |  |  |  |  | 32 |  | 31 | 309125.169 | 0.159 |  |  |  |
| 28 |  | 27 | 29.5 |  | 28.5 | 26 |  | 25 | 311142.503 | 0.164 |  |  |  |
|  |  |  |  |  |  | 27 |  | 26 | 311144.739 | 0.076 |  |  |  |
|  |  |  |  |  |  | 28 |  | 27 | 311146.621 | -0.109 |  |  |  |
|  |  |  |  |  |  | 29 |  | 28 | 311148.360 | -0.116 |  |  |  |
|  |  |  |  |  |  | 30 |  | 29 | 311149.518 | -0.311 |  |  |  |
|  |  |  |  |  |  | 31 |  | 30 | 311150.940 | 0.225 |  |  |  |
|  |  |  |  |  |  | 32 |  | 31 | 311150.940 | -0.115 |  |  |  |
|  |  |  |  |  |  | 33 |  | 32 | 311150.940 | 0.177 |  |  |  |
| 29 |  | 28 | 27.5 |  | 26.5 | 24 |  | 23 | 306840.349 | -0.170 |  |  |  |
|  |  |  |  |  |  | 25 |  | 24 | 306840.349 | 0.127 |  |  |  |
|  |  |  |  |  |  | 26 |  | 25 | 306840.349 | -0.190 |  |  |  |
|  |  |  |  |  |  | 27 |  | 26 | 306841.592 | 0.181 |  |  |  |
|  |  |  |  |  |  | 28 |  | 27 | 306842.962 | 0.191 |  |  |  |
|  |  |  |  |  |  | 29 |  | 28 | 306844.548 | -0.001 |  |  |  |
|  |  |  |  |  |  | 30 |  | 29 | 306846.655 | -0.014 |  |  |  |
|  |  |  |  |  |  | 31 |  | 30 | 306848.805 | -0.244 |  |  |  |
| 29 |  | 28 | 28.5 |  | 27.5 | 25 |  | 24 | 309115.319 | 0.159 |  |  |  |
|  |  |  |  |  |  | 26 |  | 25 | 309113.023 | 0.363 |  |  |  |
|  |  |  |  |  |  | 27 |  | 26 | 309110.662 | 0.367 |  |  |  |
|  |  |  |  |  |  | 28 |  | 27 | 309107.822 | -0.180 |  |  |  |
|  |  |  |  |  |  | 29 |  | 28 | 309105.323 | -0.393 |  |  |  |
|  |  |  |  |  |  | 30 |  | 29 | 309103.124 | -0.242 |  |  |  |
|  |  |  |  |  |  | 31 |  | 30 | 309100.500 | -0.374 |  |  |  |
|  |  |  |  |  |  | 32 |  | 31 | 309098.352 | 0.193 |  |  |  |
| 29 |  | 28 | 29.5 |  | 28.5 | 26 |  | 25 | 319965.521 | -0.017 |  |  |  |
|  |  |  |  |  |  | 27 |  | 26 | 319963.321 | 0.109 |  |  |  |
|  |  |  |  |  |  | 28 |  | 27 | 319961.159 | 0.136 |  |  |  |
|  |  |  |  |  |  | 29 |  | 28 | 319958.947 | 0.034 |  |  |  |
|  |  |  |  |  |  | 30 |  | 29 | 319956.740 | -0.083 |  |  |  |
|  |  |  |  |  |  | 31 |  | 30 | 319954.562 | -0.122 |  |  |  |
|  |  |  |  |  |  | 32 |  | 31 | 319952.384 | -0.044 |  |  |  |
|  |  |  |  |  |  | 33 |  | 32 | 319950.092 | 0.113 |  |  |  |
| 29 |  | 28 | 30.5 |  | 29.5 | 27 |  | 26 | 321955.273 | 0.139 |  |  |  |
|  |  |  |  |  |  | 28 |  | 27 | 321957.450 | 0.088 |  |  |  |
|  |  |  |  |  |  | 29 |  | 28 | 321959.282 | -0.078 |  |  |  |
|  |  |  |  |  |  | 30 |  | 29 | 321960.831 | -0.236 |  |  |  |
|  |  |  |  |  |  | 31 |  | 30 | 321962.114 | -0.307 |  |  |  |
|  |  |  |  |  |  | 32 |  | 31 | 321963.746 | 0.394 |  |  |  |
|  |  |  |  |  |  | 33 |  | 32 | 321963.746 | -0.042 |  |  |  |
|  |  |  |  |  |  | 34 |  | 33 | 321963.746 | 0.094 |  |  |  |
| 30 |  | 29 | 28.5 |  | 27.5 | 25 |  | 24 | 317668.618 | -0.131 |  |  |  |
|  |  |  |  |  |  | 26 |  | 25 | 317668.618 | 0.018 |  |  |  |
|  |  |  |  |  |  | 27 |  | 26 | 317668.618 | -0.399 |  |  |  |
|  |  |  |  |  |  | 28 |  | 27 | 317670.205 | 0.264 |  |  |  |
|  |  |  |  |  |  | 29 |  | 28 | 317671.510 | 0.199 |  |  |  |
|  |  |  |  |  |  | 30 |  | 29 | 317673.093 | 0.035 |  |  |  |
|  |  |  |  |  |  | 31 |  | 30 | 317674.966 | -0.144 |  |  |  |
|  |  |  |  |  |  | 32 |  | 31 | 317677.168 | -0.222 |  |  |  |
| 30 |  | 29 | 29.5 |  | 28.5 | 26 |  | 25 | 319938.199 | 0.224 |  |  |  |
|  |  |  |  |  |  | 27 |  | 26 | 319935.660 | 0.179 |  |  |  |
|  |  |  |  |  |  | 28 |  | 27 | 319933.217 | 0.104 |  |  |  |
|  |  |  |  |  |  | 29 |  | 28 | 319930.847 | 0.033 |  |  |  |
|  |  |  |  |  |  | 30 |  | 29 | 319928.369 | -0.153 |  |  |  |
|  |  |  |  |  |  | 31 |  | 30 | 319925.816 | -0.355 |  |  |  |
|  |  |  |  |  |  | 32 |  | 31 | 319923.528 | -0.160 |  |  |  |
|  |  |  |  |  |  | 33 |  | 32 | 319921.003 | 0.006 |  |  |  |
| 30 |  | 29 | 30.5 |  | 29.5 | 27 |  | 26 | 330788.163 | 0.016 |  | b |  |
|  |  |  |  |  |  | 28 |  | 27 | 330785.929 | 0.098 |  | b |  |
|  |  |  |  |  |  | 29 |  | 28 | 330783.814 | 0.169 |  | b |  |
|  |  |  |  |  |  | 30 |  | 29 | 330781.596 | 0.059 |  | b |  |
|  |  |  |  |  |  | 31 |  | 30 | 330779.237 | -0.211 |  | b |  |
|  |  |  |  |  |  | 32 |  | 31 | 330776.886 | -0.431 |  | b |  |
|  |  |  |  |  |  | 33 |  | 32 | 330774.956 | -0.122 |  | b |  |
|  |  |  |  |  |  | 34 |  | 33 | 330772.776 | 0.114 |  | b |  |
| 30 |  | 29 | 31.5 |  | 30.5 | 28 |  | 27 | 332765.572 | 0.103 |  | 322165.217 | 0.190 |
|  |  |  |  |  |  | 29 |  | 28 | 332767.664 | 0.059 |  | 322167.367 | 0.199 |
|  |  |  |  |  |  | 30 |  | 29 | 332769.457 | -0.079 |  | 322169.137 | -0.016 |
|  |  |  |  |  |  | 31 |  | 30 | 332771.033 | -0.174 |  | 322170.618 | -0.267 |
|  |  |  |  |  |  | 32 |  | 31 | 332772.450 | -0.110 |  | 322171.941 | -0.319 |
|  |  |  |  |  |  | 33 |  | 32 | 332773.968 | 0.436 |  | 322173.494 | 0.324 |
|  |  |  |  |  |  | 34 |  | 33 | 332773.968 | -0.090 |  | 322173.494 | -0.002 |
|  |  |  |  |  |  | 35 |  | 34 | 332773.968 | -0.098 |  | 322173.494 | 0.379 |
| 31 |  | 30 | 29.5 |  | 28.5 | 26 |  | 25 | 328495.050 | 0.017 |  | 318022.601 | -0.295 |
|  |  |  |  |  |  | 27 |  | 26 | 328495.050 | 0.030 |  | 318022.601 | 0.105 |
|  |  |  |  |  |  | 28 |  | 27 | 328495.050 | -0.477 |  | 318022.601 | -0.181 |
|  |  |  |  |  |  | 29 |  | 28 | 328496.770 | 0.271 |  | 318023.853 | 0.190 |
|  |  |  |  |  |  | 30 |  | 29 | 328498.047 | 0.172 |  | 318025.291 | 0.253 |
|  |  |  |  |  |  | 31 |  | 30 | 328499.646 | 0.056 |  | 318026.920 | 0.120 |
|  |  |  |  |  |  | 32 |  | 31 | 328501.411 | -0.165 |  | 318028.717 | -0.115 |
|  |  |  |  |  |  | 33 |  | 32 | 328503.658 | -0.101 |  | 318030.753 | -0.259 |
| 31 |  | 30 | 30.5 |  | 29.5 | 27 |  | 26 | 330758.636 | 0.196 |  | b |  |
|  |  |  |  |  |  | 28 |  | 27 | 330756.167 | 0.221 |  | b |  |
|  |  |  |  |  |  | 29 |  | 28 | 330753.708 | 0.137 |  | b |  |
|  |  |  |  |  |  | 30 |  | 29 | 330751.236 | -0.025 |  | b |  |
|  |  |  |  |  |  | 31 |  | 30 | 330748.814 | -0.144 |  | b |  |
|  |  |  |  |  |  | 32 |  | 31 | 330746.389 | -0.211 |  | b |  |
|  |  |  |  |  |  | 33 |  | 32 | 330744.046 | -0.072 |  | b |  |
|  |  |  |  |  |  | 34 |  | 33 | 330741.508 | 0.064 |  | b |  |
| 31 |  | 30 | 31.5 |  | 30.5 | 28 |  | 27 | 341608.421 | -0.008 |  | b |  |
|  |  |  |  |  |  | 29 |  | 28 | 341606.292 | 0.174 |  | b |  |
|  |  |  |  |  |  | 30 |  | 29 | 341604.082 | 0.150 |  | b |  |
|  |  |  |  |  |  | 31 |  | 30 | 341601.870 | 0.050 |  | b |  |
|  |  |  |  |  |  | 32 |  | 31 | 341599.701 | -0.028 |  | 330738.071 | -0.037 |
|  |  |  |  |  |  | 33 |  | 32 | 341597.476 | -0.126 |  | 330735.937 | -0.096 |
|  |  |  |  |  |  | 34 |  | 33 | 341595.272 | -0.103 |  | 330733.718 | -0.068 |
|  |  |  |  |  |  | 35 |  | 34 | 341593.039 | 0.055 |  | 330731.621 | 0.368 |
| 31 |  | 30 | 32.5 |  | 31.5 | 29 |  | 28 | 343573.288 | 0.019 |  | 332629.674 | 0.282 |
|  |  |  |  |  |  | 30 |  | 29 | 343575.339 | 0.022 |  | 332631.548 | 0.096 |
|  |  |  |  |  |  | 31 |  | 30 | 343577.166 | -0.017 |  | 332633.285 | -0.090 |
|  |  |  |  |  |  | 32 |  | 31 | 343578.708 | -0.111 |  | 332634.826 | -0.244 |
|  |  |  |  |  |  | 33 |  | 32 | 343580.380 | 0.210 |  | 332635.762 | -0.680 |
|  |  |  |  |  |  | 34 |  | 33 | 343581.745 | 0.565 |  | 332637.769 | 0.379 |
|  |  |  |  |  |  | 35 |  | 34 | 343581.745 | -0.043 |  | 332637.769 | -0.037 |
|  |  |  |  |  |  | 36 |  | 35 | 343581.745 | -0.185 |  | 332637.769 | 0.195 |
| 32 |  | 31 | 30.5 |  | 29.5 | 27 |  | 26 | 339319.461 | 0.166 |  | b |  |
|  |  |  |  |  |  | 28 |  | 27 | 339319.461 | 0.054 |  | b |  |
|  |  |  |  |  |  | 29 |  | 28 | 339319.461 | -0.536 |  | b |  |
|  |  |  |  |  |  | 30 |  | 29 | 339321.331 | 0.320 |  | b |  |
|  |  |  |  |  |  | 31 |  | 30 | 339322.527 | 0.136 |  | 328505.460 | 0.290 |
|  |  |  |  |  |  | 32 |  | 31 | 339324.152 | 0.078 |  | 328507.043 | 0.144 |
|  |  |  |  |  |  | 33 |  | 32 | 339325.924 | -0.071 |  | 328508.902 | 0.032 |
|  |  |  |  |  |  | 34 |  | 33 | 339328.027 | -0.056 |  | 328510.952 | -0.012 |
| 32 |  | 31 | 31.5 |  | 30.5 | 28 |  | 27 | 341576.641 | 0.169 |  | 330717.865 | -0.091 |
|  |  |  |  |  |  | 29 |  | 28 | 341574.198 | 0.225 |  | 330715.537 | 0.145 |
|  |  |  |  |  |  | 30 |  | 29 | 341571.746 | 0.159 |  | 330713.089 | 0.059 |
|  |  |  |  |  |  | 31 |  | 30 | 341569.236 | -0.025 |  | 330710.677 | -0.107 |
|  |  |  |  |  |  | 32 |  | 31 | 341566.793 | -0.150 |  | 330708.445 | -0.114 |
|  |  |  |  |  |  | 33 |  | 32 | 341564.342 | -0.230 |  | b |  |
|  |  |  |  |  |  | 34 |  | 33 | 341561.882 | -0.204 |  | b |  |
|  |  |  |  |  |  | 35 |  | 34 | 341559.377 | -0.043 |  | 330701.149 | 0.176 |
| 32 |  | 31 | 32.5 |  | 31.5 | 29 |  | 28 | 352426.241 | -0.064 |  | 341221.480 | 0.137 |
|  |  |  |  |  |  | 30 |  | 29 | 352423.978 | -0.017 |  | 341218.967 | -0.019 |
|  |  |  |  |  |  | 31 |  | 30 | 352421.875 | 0.071 |  | 341216.633 | -0.199 |
|  |  |  |  |  |  | 32 |  | 31 | 352419.673 | -0.013 |  | 341214.840 | 0.041 |
|  |  |  |  |  |  | 33 |  | 32 | 352417.523 | -0.067 |  | 341212.449 | -0.351 |
|  |  |  |  |  |  | 34 |  | 33 | 352415.369 | -0.092 |  | 341210.495 | -0.245 |
|  |  |  |  |  |  | 35 |  | 34 | 352413.160 | -0.082 |  | 341208.437 | -0.084 |
|  |  |  |  |  |  | 36 |  | 35 | 352410.878 | 0.006 |  | 341206.210 | 0.175 |
| 32 |  | 31 | 33.5 |  | 32.5 | 30 |  | 29 | 354378.435 | -0.024 |  | 343091.393 | 0.089 |
|  |  |  |  |  |  | 31 |  | 30 | 354380.442 | 0.021 |  | 343093.345 | 0.060 |
|  |  |  |  |  |  | 32 |  | 31 | 354382.195 | -0.030 |  | 343095.082 | -0.065 |
|  |  |  |  |  |  | 33 |  | 32 | 354383.703 | -0.123 |  | 343096.626 | -0.181 |
|  |  |  |  |  |  | 34 |  | 33 | 354385.050 | -0.124 |  | 343097.829 | -0.347 |
|  |  |  |  |  |  | 35 |  | 34 | 354386.876 | 0.657 |  | 343099.544 | 0.385 |
|  |  |  |  |  |  | 36 |  | 35 | 354386.876 | -0.028 |  | 343099.544 | -0.114 |
|  |  |  |  |  |  | 37 |  | 36 | 354386.876 | -0.295 |  | 343099.544 | -0.022 |
| 33 |  | 32 | 31.5 |  | 30.5 | 28 |  | 27 | 350141.717 | 0.257 |  | 338980.600 | -0.027 |
|  |  |  |  |  |  | 29 |  | 28 | 350141.717 | 0.029 |  | 338980.600 | 0.101 |
|  |  |  |  |  |  | 30 |  | 29 | 350141.717 | -0.637 |  | 338980.600 | -0.362 |
|  |  |  |  |  |  | 31 |  | 30 | 350143.670 | 0.265 |  | 338982.247 | 0.318 |
|  |  |  |  |  |  | 32 |  | 31 | 350144.881 | 0.096 |  | 338983.726 | 0.415 |
|  |  |  |  |  |  | 33 |  | 32 | 350146.489 | 0.053 |  | 338985.215 | 0.207 |
|  |  |  |  |  |  | 34 |  | 33 | 350148.206 | -0.087 |  | 338986.772 | -0.147 |
|  |  |  |  |  |  | 35 |  | 34 | 350150.284 | -0.004 |  | 338988.568 | -0.362 |
| 33 |  | 32 | 32.5 |  | 31.5 | 29 |  | 28 | 352392.121 | 0.131 |  | 341190.554 | 0.091 |
|  |  |  |  |  |  | 30 |  | 29 | 352389.705 | 0.224 |  | 341188.040 | 0.127 |
|  |  |  |  |  |  | 31 |  | 30 | 352387.203 | 0.125 |  | 341185.657 | 0.102 |
|  |  |  |  |  |  | 32 |  | 31 | 352384.716 | -0.018 |  | 341183.095 | -0.210 |
|  |  |  |  |  |  | 33 |  | 32 | 352382.233 | -0.162 |  | 341180.867 | -0.209 |
|  |  |  |  |  |  | 34 |  | 33 | 352379.778 | -0.229 |  | 341178.477 | -0.295 |
|  |  |  |  |  |  | 35 |  | 34 | 352377.249 | -0.263 |  | 341176.295 | 0.001 |
|  |  |  |  |  |  | 36 |  | 35 | 352375.052 | 0.206 |  | b |  |
| 33 |  | 32 | 33.5 |  | 32.5 | 30 |  | 29 | 363241.676 | -0.021 |  | 351693.639 | -0.027 |
|  |  |  |  |  |  | 31 |  | 30 | 363239.486 | 0.102 |  | 351691.513 | 0.186 |
|  |  |  |  |  |  | 32 |  | 31 | 363237.374 | 0.189 |  | 351689.276 | 0.094 |
|  |  |  |  |  |  | 33 |  | 32 | 363235.544 | 0.487 |  | 351687.223 | 0.070 |
|  |  |  |  |  |  | 34 |  | 33 | 363233.138 | 0.185 |  | 351685.229 | 0.071 |
|  |  |  |  |  |  | 35 |  | 34 | 363230.733 | -0.086 |  | 351682.936 | -0.172 |
|  |  |  |  |  |  | 36 |  | 35 | 363228.334 | -0.270 |  | 351680.816 | -0.094 |
|  |  |  |  |  |  | 37 |  | 36 | 363225.833 | -0.416 |  | 351678.778 | 0.313 |
| 33 |  | 32 | 34.5 |  | 33.5 | 31 |  | 30 | 365180.873 | -0.090 |  | 353550.816 | 0.128 |
|  |  |  |  |  |  | 32 |  | 31 | 365182.831 | -0.010 |  | 353552.523 | -0.071 |
|  |  |  |  |  |  | 33 |  | 32 | 365184.564 | -0.021 |  | 353554.260 | -0.138 |
|  |  |  |  |  |  | 34 |  | 33 | 365186.087 | -0.065 |  | 353555.836 | -0.187 |
|  |  |  |  |  |  | 35 |  | 34 | 365187.571 | 0.074 |  | 353557.176 | -0.212 |
|  |  |  |  |  |  | 36 |  | 35 | 365188.921 | 0.348 |  | 353558.765 | 0.360 |
|  |  |  |  |  |  | 37 |  | 36 | 365189.469 | 0.139 |  | 353558.765 | -0.215 |
|  |  |  |  |  |  | 38 |  | 37 | 365189.469 | -0.245 |  | 353558.765 | -0.253 |
| 34 |  | 33 | 32.5 |  | 31.5 | 29 |  | 28 | 360961.790 | 0.338 |  | 349456.741 | 0.268 |
|  |  |  |  |  |  | 30 |  | 29 | 360961.790 | 0.003 |  | 349456.741 | 0.274 |
|  |  |  |  |  |  | 31 |  | 30 | 360961.790 | -0.732 |  | 349456.741 | -0.265 |
|  |  |  |  |  |  | 32 |  | 31 | 360963.640 | 0.034 |  | 349457.519 | -0.492 |
|  |  |  |  |  |  | 33 |  | 32 | 360965.066 | 0.081 |  | 349459.538 | 0.146 |
|  |  |  |  |  |  | 34 |  | 33 | 360966.578 | -0.024 |  | 349461.108 | 0.050 |
|  |  |  |  |  |  | 35 |  | 34 | 360968.396 | 0.000 |  | 349462.869 | -0.039 |
|  |  |  |  |  |  | 36 |  | 35 | 360970.366 | 0.066 |  | 349464.759 | -0.079 |
| 34 |  | 33 | 33.5 |  | 32.5 | 30 |  | 29 | 363204.996 | 0.085 |  | 351660.526 | -0.026 |
|  |  |  |  |  |  | 31 |  | 30 | 363202.568 | 0.180 |  | 351658.190 | 0.180 |
|  |  |  |  |  |  | 32 |  | 31 | 363200.072 | 0.107 |  | 351655.841 | 0.192 |
|  |  |  |  |  |  | 33 |  | 32 | 363197.659 | 0.062 |  | 351653.386 | -0.006 |
|  |  |  |  |  |  | 34 |  | 33 | 363195.122 | -0.113 |  | 351651.084 | -0.069 |
|  |  |  |  |  |  | 35 |  | 34 | 363192.605 | -0.221 |  | 351648.662 | -0.183 |
|  |  |  |  |  |  | 36 |  | 35 | 363190.126 | -0.189 |  | 351646.246 | -0.126 |
|  |  |  |  |  |  | 37 |  | 36 | 363187.660 | 0.016 |  | 351643.917 | 0.283 |
| 34 |  | 33 | 34.5 |  | 33.5 | 31 |  | 30 | 374054.386 | -0.141 |  | 362163.379 | -0.221 |
|  |  |  |  |  |  | 32 |  | 31 | 374052.197 | -0.009 |  | 362161.342 | 0.068 |
|  |  |  |  |  |  | 33 |  | 32 | 374050.093 | 0.096 |  | 362159.098 | -0.035 |
|  |  |  |  |  |  | 34 |  | 33 | 374047.915 | 0.058 |  | 362156.834 | -0.271 |
|  |  |  |  |  |  | 35 |  | 34 | 374045.684 | -0.056 |  | b |  |
|  |  |  |  |  |  | 36 |  | 35 | 374043.511 | -0.089 |  | b |  |
|  |  |  |  |  |  | 37 |  | 36 | 374041.237 | -0.147 |  | b |  |
|  |  |  |  |  |  | 38 |  | 37 | 374039.147 | 0.107 |  | b |  |
| 34 |  | 33 | 35.5 |  | 34.5 | 32 |  | 31 | 375980.501 | -0.205 |  | b |  |
|  |  |  |  |  |  | 33 |  | 32 | 375982.511 | 0.008 |  | b |  |
|  |  |  |  |  |  | 34 |  | 33 | 375984.264 | 0.077 |  | b |  |
|  |  |  |  |  |  | 35 |  | 34 | 375985.664 | -0.056 |  | b |  |
|  |  |  |  |  |  | 36 |  | 35 | 375987.076 | 0.015 |  | b |  |
|  |  |  |  |  |  | 37 |  | 36 | 375988.135 | -0.032 |  | b |  |
|  |  |  |  |  |  | 38 |  | 37 | 375989.115 | 0.123 |  | b |  |
|  |  |  |  |  |  | 39 |  | 38 | 375989.115 | -0.371 |  | b |  |
| 35 |  | 34 | 33.5 |  | 32.5 | 30 |  | 29 | 371779.537 | 0.343 |  | 359930.344 | 0.134 |
|  |  |  |  |  |  | 31 |  | 30 | 371779.537 | -0.092 |  | 359930.344 | 0.027 |
|  |  |  |  |  |  | 32 |  | 31 | 371780.158 | -0.269 |  | 359930.344 | -0.584 |
|  |  |  |  |  |  | 33 |  | 32 | 371781.571 | 0.030 |  | 359932.108 | 0.143 |
|  |  |  |  |  |  | 34 |  | 33 | 371782.941 | 0.024 |  | 359933.522 | 0.177 |
|  |  |  |  |  |  | 35 |  | 34 | 371784.483 | -0.016 |  | 359934.898 | -0.080 |
|  |  |  |  |  |  | 36 |  | 35 | 371786.223 | -0.006 |  | 359936.665 | -0.104 |
|  |  |  |  |  |  | 37 |  | 36 | 371788.206 | 0.162 |  | 359938.611 | -0.008 |
| 35 |  | 34 | 34.5 |  | 33.5 | 31 |  | 30 | 374015.013 | -0.139 |  | b |  |
|  |  |  |  |  |  | 32 |  | 31 | 374012.960 | 0.349 |  | 362125.802 | 0.196 |
|  |  |  |  |  |  | 33 |  | 32 | 374010.149 | -0.016 |  | 362123.181 | -0.058 |
|  |  |  |  |  |  | 34 |  | 33 | 374007.867 | 0.097 |  | 362121.047 | 0.078 |
|  |  |  |  |  |  | 35 |  | 34 | 374005.135 | -0.245 |  | 362118.517 | -0.200 |
|  |  |  |  |  |  | 36 |  | 35 | 374002.909 | -0.037 |  | 362116.420 | 0.022 |
|  |  |  |  |  |  | 37 |  | 36 | 374000.170 | -0.245 |  | 362113.560 | -0.365 |
|  |  |  |  |  |  | 38 |  | 37 | 373997.880 | 0.147 |  | 362111.345 | 0.144 |
| 35 |  | 34 | 35.5 |  | 34.5 | 32 |  | 31 | 384864.623 | -0.093 |  | 372631.006 | -0.067 |
|  |  |  |  |  |  | 33 |  | 32 | 384862.464 | 0.078 |  | 372628.852 | 0.096 |
|  |  |  |  |  |  | 34 |  | 33 | 384860.199 | 0.036 |  | 372626.835 | 0.219 |
|  |  |  |  |  |  | 35 |  | 34 | 384858.079 | 0.071 |  | 372624.717 | 0.133 |
|  |  |  |  |  |  | 36 |  | 35 | 384855.770 | -0.107 |  | 372622.523 | -0.063 |
|  |  |  |  |  |  | 37 |  | 36 | 384853.800 | 0.074 |  | 372620.463 | -0.081 |
|  |  |  |  |  |  | 38 |  | 37 | 384851.467 | -0.040 |  | 372618.305 | -0.070 |
|  |  |  |  |  |  | 39 |  | 38 | 384849.184 | 0.015 |  | 372616.193 | 0.203 |
| 35 |  | 34 | 36.5 |  | 35.5 | 33 |  | 32 | 386777.366 | -0.248 |  | 374461.411 | -0.180 |
|  |  |  |  |  |  | 34 |  | 33 | 386779.571 | 0.240 |  | 374463.295 | -0.054 |
|  |  |  |  |  |  | 35 |  | 34 | b |  |  | 374465.012 | -0.030 |
|  |  |  |  |  |  | 36 |  | 35 | b |  |  | 374466.405 | -0.196 |
|  |  |  |  |  |  | 37 |  | 36 | b |  |  | 374468.108 | 0.151 |
|  |  |  |  |  |  | 38 |  | 37 | b |  |  | 374469.776 | 0.743 |
|  |  |  |  |  |  | 39 |  | 38 | b |  |  | 374469.776 | 0.026 |
|  |  |  |  |  |  | 40 |  | 39 | b |  |  | 374469.776 | -0.248 |
| 36 |  | 35 | 34.5 |  | 33.5 | 31 |  | 30 | b |  |  | b |  |
|  |  |  |  |  |  | 32 |  | 31 | b |  |  | b |  |
|  |  |  |  |  |  | 33 |  | 32 | b |  |  | b |  |
|  |  |  |  |  |  | 34 |  | 33 | b |  |  | 370403.586 | -0.135 |
|  |  |  |  |  |  | 35 |  | 34 | b |  |  | 370405.271 | 0.174 |
|  |  |  |  |  |  | 36 |  | 35 | b |  |  | 370406.680 | -0.018 |
|  |  |  |  |  |  | 37 |  | 36 | b |  |  | 370408.380 | -0.051 |
|  |  |  |  |  |  | 38 |  | 37 | b |  |  | 370410.244 | 0.042 |
| 36 |  | 35 | 35.5 |  | 34.5 | 32 |  | 31 | 384822.583 | -0.048 |  | 372593.334 | 0.168 |
|  |  |  |  |  |  | 33 |  | 32 | 384820.296 | 0.227 |  | 372590.687 | 0.062 |
|  |  |  |  |  |  | 34 |  | 33 | 384817.496 | -0.100 |  | 372588.241 | -0.006 |
|  |  |  |  |  |  | 35 |  | 34 | 384815.290 | 0.119 |  | 372586.061 | 0.100 |
|  |  |  |  |  |  | 36 |  | 35 | 384812.655 | -0.095 |  | 372583.564 | -0.127 |
|  |  |  |  |  |  | 37 |  | 36 | 384810.148 | -0.139 |  | 372581.004 | -0.354 |
|  |  |  |  |  |  | 38 |  | 37 | 384807.627 | -0.105 |  | 372578.779 | -0.099 |
|  |  |  |  |  |  | 39 |  | 38 | 384805.127 | 0.094 |  | 372576.378 | 0.216 |
| 36 |  | 35 | 36.5 |  | 35.5 | 33 |  | 32 | 395672.112 | -0.077 |  | 383095.912 | -0.102 |
|  |  |  |  |  |  | 34 |  | 33 | 395669.849 | 0.004 |  | 383093.878 | 0.177 |
|  |  |  |  |  |  | 35 |  | 34 | 395667.662 | 0.056 |  | 383091.714 | 0.156 |
|  |  |  |  |  |  | 36 |  | 35 | 395665.466 | 0.033 |  | 383089.692 | 0.172 |
|  |  |  |  |  |  | 37 |  | 36 | 395663.309 | 0.023 |  | 383087.461 | -0.055 |
|  |  |  |  |  |  | 38 |  | 37 | 395661.108 | -0.014 |  | 383085.352 | -0.121 |
|  |  |  |  |  |  | 39 |  | 38 | 395658.932 | 0.035 |  | 383083.235 | -0.076 |
|  |  |  |  |  |  | 40 |  | 39 | 395656.551 | -0.012 |  | 383081.117 | 0.168 |
| 36 |  | 35 | 37.5 |  | 36.5 | 34 |  | 33 | 397571.283 | -0.329 |  | 384912.811 | -0.154 |
|  |  |  |  |  |  | 35 |  | 34 | 397573.214 | -0.036 |  | 384914.687 | 0.035 |
|  |  |  |  |  |  | 36 |  | 35 | 397574.877 | 0.058 |  | 384916.334 | 0.043 |
|  |  |  |  |  |  | 37 |  | 36 | 397576.376 | 0.091 |  | 384917.862 | 0.044 |
|  |  |  |  |  |  | 38 |  | 37 | 397577.538 | -0.078 |  | 384919.376 | 0.208 |
|  |  |  |  |  |  | 39 |  | 38 | 397578.999 | 0.224 |  | 384920.557 | 0.286 |
|  |  |  |  |  |  | 40 |  | 39 | 397579.880 | 0.156 |  | 384921.155 | 0.102 |
|  |  |  |  |  |  | 41 |  | 40 | 397579.880 | -0.542 |  | 384921.155 | -0.281 |
| 37 |  | 36 | 35.5 |  | 34.5 | 32 |  | 31 | 393408.192 | 0.566 |  | 380871.416 | 0.347 |
|  |  |  |  |  |  | 33 |  | 32 | 393408.192 | -0.049 |  | 380871.416 | 0.037 |
|  |  |  |  |  |  | 34 |  | 33 | 393409.254 | 0.102 |  | 380871.416 | -0.701 |
|  |  |  |  |  |  | 35 |  | 34 | 393410.290 | -0.024 |  | 380873.248 | 0.038 |
|  |  |  |  |  |  | 36 |  | 35 | 393411.612 | -0.064 |  | 380874.559 | -0.021 |
|  |  |  |  |  |  | 37 |  | 36 | 393413.073 | -0.114 |  | 380876.172 | 0.025 |
|  |  |  |  |  |  | 38 |  | 37 | 393414.980 | 0.189 |  | 380877.795 | -0.027 |
|  |  |  |  |  |  | 39 |  | 38 | 393416.657 | 0.228 |  | 380879.653 | 0.138 |
| 37 |  | 36 | 36.5 |  | 35.5 | 33 |  | 32 | 395627.232 | -0.035 |  | 383055.510 | -0.030 |
|  |  |  |  |  |  | 34 |  | 33 | 395624.704 | 0.024 |  | 383053.229 | 0.236 |
|  |  |  |  |  |  | 35 |  | 34 | 395622.222 | 0.045 |  | 383050.834 | 0.234 |
|  |  |  |  |  |  | 36 |  | 35 | 395619.671 | -0.048 |  | 383048.341 | 0.048 |
|  |  |  |  |  |  | 37 |  | 36 | 395617.183 | -0.081 |  | 383046.010 | 0.008 |
|  |  |  |  |  |  | 38 |  | 37 | 395614.653 | -0.115 |  | 383043.493 | -0.157 |
|  |  |  |  |  |  | 39 |  | 38 | 395612.181 | -0.003 |  | 383041.153 | -0.006 |
|  |  |  |  |  |  | 40 |  | 39 | 395609.620 | 0.156 |  | 383038.577 | 0.133 |
| 37 |  | 36 | 37.5 |  | 36.5 | 34 |  | 33 | b |  |  | b |  |
|  |  |  |  |  |  | 35 |  | 34 | b |  |  | b |  |
|  |  |  |  |  |  | 36 |  | 35 | 406472.301 | 0.052 |  | b |  |
|  |  |  |  |  |  | 37 |  | 36 | 406470.063 | 0.007 |  | b |  |
|  |  |  |  |  |  | 38 |  | 37 | 406467.894 | 0.003 |  | b |  |
|  |  |  |  |  |  | 39 |  | 38 | 406465.659 | -0.054 |  | b |  |
|  |  |  |  |  |  | 40 |  | 39 | 406463.462 | -0.016 |  | b |  |
|  |  |  |  |  |  | 41 |  | 40 | 406461.203 | 0.059 |  | b |  |
| 37 |  | 36 | 38.5 |  | 37.5 | 35 |  | 34 | b |  |  | b |  |
|  |  |  |  |  |  | 36 |  | 35 | b |  |  | b |  |
|  |  |  |  |  |  | 37 |  | 36 | b |  |  | b |  |
|  |  |  |  |  |  | 38 |  | 37 | b |  |  | b |  |
|  |  |  |  |  |  | 39 |  | 38 | b |  |  | b |  |
|  |  |  |  |  |  | 40 |  | 39 | b |  |  | b |  |
|  |  |  |  |  |  | 41 |  | 40 | b |  |  | b |  |
|  |  |  |  |  |  | 42 |  | 41 | b |  |  | b |  |
| 38 |  | 37 | 36.5 |  | 35.5 | 33 |  | 32 | 404218.766 | 0.602 |  | b |  |
|  |  |  |  |  |  | 34 |  | 33 | 404218.766 | -0.094 |  | b |  |
|  |  |  |  |  |  | 35 |  | 34 | 404219.404 | -0.418 |  | b |  |
|  |  |  |  |  |  | 36 |  | 35 | 404220.810 | -0.193 |  | b |  |
|  |  |  |  |  |  | 37 |  | 36 | 404222.236 | -0.119 |  | b |  |
|  |  |  |  |  |  | 38 |  | 37 | 404223.751 | -0.078 |  | b |  |
|  |  |  |  |  |  | 39 |  | 38 | 404225.432 | 0.063 |  | b |  |
|  |  |  |  |  |  | 40 |  | 39 | 404227.331 | 0.411 |  | b |  |
| 38 |  | 37 | 37.5 |  | 36.5 | 34 |  | 33 | 406428.816 | -0.161 |  | b |  |
|  |  |  |  |  |  | 35 |  | 34 | 406426.334 | -0.028 |  | b |  |
|  |  |  |  |  |  | 36 |  | 35 | 406423.769 | -0.057 |  | b |  |
|  |  |  |  |  |  | 37 |  | 36 | 406421.321 | -0.012 |  | b |  |
|  |  |  |  |  |  | 38 |  | 37 | 406418.831 | -0.010 |  | 393505.472 | -0.102 |
|  |  |  |  |  |  | 39 |  | 38 | 406416.264 | -0.045 |  | 393503.024 | -0.176 |
|  |  |  |  |  |  | 40 |  | 39 | 406413.763 | 0.070 |  | 393500.601 | -0.092 |
|  |  |  |  |  |  | 41 |  | 40 | 406411.252 | 0.306 |  | 393498.203 | 0.230 |
| 38 |  | 37 | 38.5 |  | 37.5 | 35 |  | 34 | 417278.270 | -0.402 |  | 404017.884 | -0.131 |
|  |  |  |  |  |  | 36 |  | 35 | 417276.126 | -0.169 |  | 404015.831 | 0.132 |
|  |  |  |  |  |  | 37 |  | 36 | 417273.979 | -0.037 |  | 404013.578 | 0.037 |
|  |  |  |  |  |  | 38 |  | 37 | 417271.769 | -0.033 |  | 404011.551 | 0.069 |
|  |  |  |  |  |  | 39 |  | 38 | 417269.660 | 0.044 |  | 404009.395 | -0.063 |
|  |  |  |  |  |  | 40 |  | 39 | 417267.501 | 0.081 |  | 404007.301 | -0.102 |
|  |  |  |  |  |  | 41 |  | 40 | 417265.273 | 0.098 |  | 404005.124 | -0.122 |
|  |  |  |  |  |  | 42 |  | 41 | 417263.016 | 0.178 |  | 404003.137 | 0.222 |
| 38 |  | 37 | 39.5 |  | 38.5 | 36 |  | 35 | 419150.074 | -0.505 |  | 405807.016 | -0.183 |
|  |  |  |  |  |  | 37 |  | 36 | 419151.956 | -0.107 |  | 405808.784 | 0.037 |
|  |  |  |  |  |  | 38 |  | 37 | 419153.604 | 0.085 |  | b |  |
|  |  |  |  |  |  | 39 |  | 38 | 419155.106 | 0.186 |  | b |  |
|  |  |  |  |  |  | 40 |  | 39 | 419156.567 | 0.329 |  | b |  |
|  |  |  |  |  |  | 41 |  | 40 | 419158.013 | 0.570 |  | b |  |
|  |  |  |  |  |  | 42 |  | 41 | 419158.842 | 0.338 |  | 405815.442 | 0.306 |
|  |  |  |  |  |  | 43 |  | 42 | 419158.842 | -0.545 |  | 405815.442 | -0.279 |
| 39 |  | 38 | 37.5 |  | 36.5 | 34 |  | 33 | 415026.535 | 0.387 |  | 401802.935 | 0.311 |
|  |  |  |  |  |  | 35 |  | 34 | 415026.535 | -0.386 |  | 401802.935 | -0.177 |
|  |  |  |  |  |  | 36 |  | 35 | 415027.330 | -0.599 |  | 401803.622 | -0.337 |
|  |  |  |  |  |  | 37 |  | 36 | 415028.761 | -0.365 |  | 401805.286 | 0.190 |
|  |  |  |  |  |  | 38 |  | 37 | 415030.280 | -0.187 |  | 401806.188 | -0.264 |
|  |  |  |  |  |  | 39 |  | 38 | 415031.799 | -0.103 |  | 401808.228 | 0.279 |
|  |  |  |  |  |  | 40 |  | 39 | 415033.486 | 0.108 |  | 401809.232 | -0.276 |
|  |  |  |  |  |  | 41 |  | 40 | 415035.332 | 0.491 |  | 401811.323 | 0.278 |
| 39 |  | 38 | 38.5 |  | 37.5 | 35 |  | 34 | 417227.462 | -0.217 |  | 403971.914 | -0.127 |
|  |  |  |  |  |  | 36 |  | 35 | 417224.897 | -0.137 |  | 403969.487 | 0.018 |
|  |  |  |  |  |  | 37 |  | 36 | 417222.428 | -0.035 |  | 403967.109 | 0.073 |
|  |  |  |  |  |  | 38 |  | 37 | 417219.915 | -0.015 |  | 403964.686 | 0.007 |
|  |  |  |  |  |  | 39 |  | 38 | 417217.437 | 0.038 |  | b |  |
|  |  |  |  |  |  | 40 |  | 39 | 417214.891 | 0.063 |  | b |  |
|  |  |  |  |  |  | 41 |  | 40 | 417212.238 | 0.062 |  | b |  |
|  |  |  |  |  |  | 42 |  | 41 | 417209.888 | 0.490 |  | b |  |
| 39 |  | 38 | 39.5 |  | 38.5 | 36 |  | 35 |  |  |  | 414474.820 | -0.113 |
|  |  |  |  |  |  | 37 |  | 36 |  |  |  | 414472.591 | -0.020 |
|  |  |  |  |  |  | 38 |  | 37 |  |  |  | 414470.501 | 0.060 |
|  |  |  |  |  |  | 39 |  | 38 |  |  |  | 414468.292 | -0.076 |
|  |  |  |  |  |  | 40 |  | 39 |  |  |  | 414466.292 | -0.038 |
|  |  |  |  |  |  | 41 |  | 40 |  |  |  | 414464.197 | -0.068 |
|  |  |  |  |  |  | 42 |  | 41 |  |  |  | 414461.998 | -0.109 |
|  |  |  |  |  |  | 43 |  | 42 |  |  |  | 414459.844 | 0.059 |
| 39 |  | 38 | 40.5 |  | 39.5 | 37 |  | 36 |  |  |  | 416249.723 | -0.193 |
|  |  |  |  |  |  | 38 |  | 37 |  |  |  | 416251.632 | 0.237 |
|  |  |  |  |  |  | 39 |  | 38 |  |  |  | 416252.932 | 0.056 |
|  |  |  |  |  |  | 40 |  | 39 |  |  |  | b |  |
|  |  |  |  |  |  | 41 |  | 40 |  |  |  | b |  |
|  |  |  |  |  |  | 42 |  | 41 |  |  |  | b |  |
|  |  |  |  |  |  | 43 |  | 42 |  |  |  | 416258.075 | 0.301 |
|  |  |  |  |  |  | 44 |  | 43 |  |  |  | 416258.075 | -0.378 |
| 40 |  | 39 | 38.5 |  | 37.5 | 35 |  | 34 |  |  |  | 412265.099 | 0.368 |
|  |  |  |  |  |  | 36 |  | 35 |  |  |  | 412265.099 | -0.202 |
|  |  |  |  |  |  | 37 |  | 36 |  |  |  | 412265.879 | -0.318 |
|  |  |  |  |  |  | 38 |  | 37 |  |  |  | 412267.522 | 0.170 |
|  |  |  |  |  |  | 39 |  | 38 |  |  |  | 412268.341 | -0.356 |
|  |  |  |  |  |  | 40 |  | 39 |  |  |  | 412270.079 | -0.080 |
|  |  |  |  |  |  | 41 |  | 40 |  |  |  | 412271.741 | 0.081 |
|  |  |  |  |  |  | 42 |  | 41 |  |  |  | 412273.628 | 0.509 |
| 40 |  | 39 | 39.5 |  | 38.5 | 36 |  | 35 |  |  |  | 414426.054 | 0.037 |
|  |  |  |  |  |  | 37 |  | 36 |  |  |  | 414423.554 | 0.126 |
|  |  |  |  |  |  | 38 |  | 37 |  |  |  | 414420.861 | -0.109 |
|  |  |  |  |  |  | 39 |  | 38 |  |  |  | 414418.489 | -0.094 |
|  |  |  |  |  |  | 40 |  | 39 |  |  |  | 414416.107 | -0.100 |
|  |  |  |  |  |  | 41 |  | 40 |  |  |  | 414413.672 | -0.105 |
|  |  |  |  |  |  | 42 |  | 41 |  |  |  | 414411.249 | 0.024 |
|  |  |  |  |  |  | 43 |  | 42 |  |  |  | 414408.668 | 0.188 |

a In MHz, for v = 0.

b Blended lines. Not included in fit.
